# Supplementary material
Source: Springer Nature journal article supplement (https://www.springermedizin.de/resource/supplementary/12939_2012_381_MOESM1_ESM.pdf/9551016)

# Correlates of Any Health Expenditure

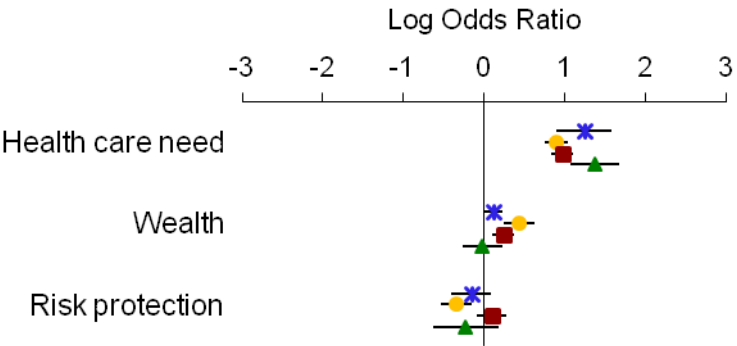

✱ China (n=3723)

● Malaysia (n=5355)

Supplement: MOESM1 [file 9551016]
